# Supplementary material for: A general seed-mediated approach to the synthesis of AgM (M = Au, Pt, and Pd) core–shell nanoplates and their SERS properties
Source: Royal Society of Chemistry journal article supplement (doi:10.1039/c7ra04301e), 2017-01-01
Supplement: c7ra04301e1.pdf [file c7ra04301e1.pdf]

**Supporting information for:**

**A general seed-mediated approach to the synthesis of AgM (M = Au, Pt, and Pd) core-shell nanoplates and their SERS properties**

*Siva Kumar-Krishnan,<sup>a\*</sup> M. Estevez-González,<sup>a</sup> Ramiro Pérez,<sup>a</sup> Rodrigo Esparza,<sup>a\*</sup> and M. Meyyappan.<sup>b</sup>*

<sup>a</sup>Centro de Física Aplicada y Tecnología Avanzada, Universidad Nacional Autónoma de México, Boulevard Juriquilla 3001, Santiago de Querétaro, Qro., 76230, México.

<sup>b</sup>Center for Nanotechnology, NASA Ames Research Center, Moffett Field, Mountain View, California 94035, United States

Corresponding author: [skumar@fata.unam.mx](mailto:skumar@fata.unam.mx); [resparza@fata.unam.mx](mailto:resparza@fata.unam.mx)

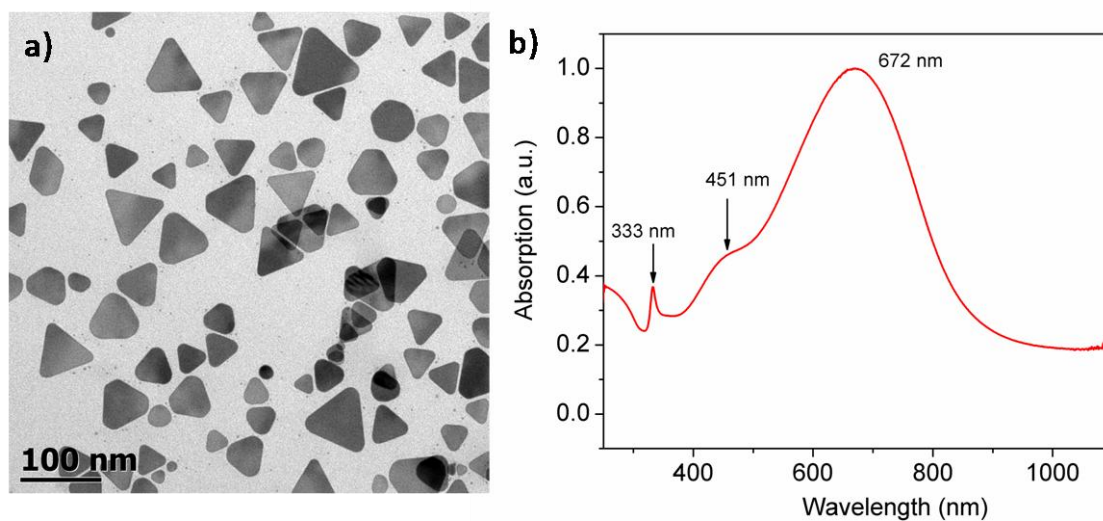

**Figure S1.** (a) TEM image of Ag nanoplates. (b) UV-vis spectra of dispersion of Ag nanoplates dispersed in DI water.

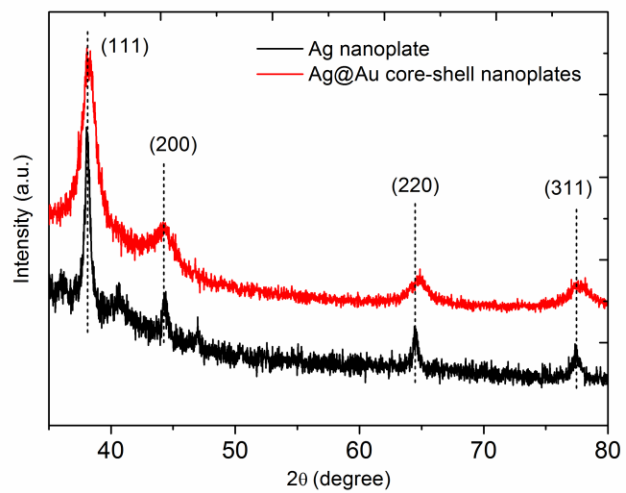

**Figure S2.** XRD pattern of the Ag nanoplates and Ag@Au core-shell nanoplates.

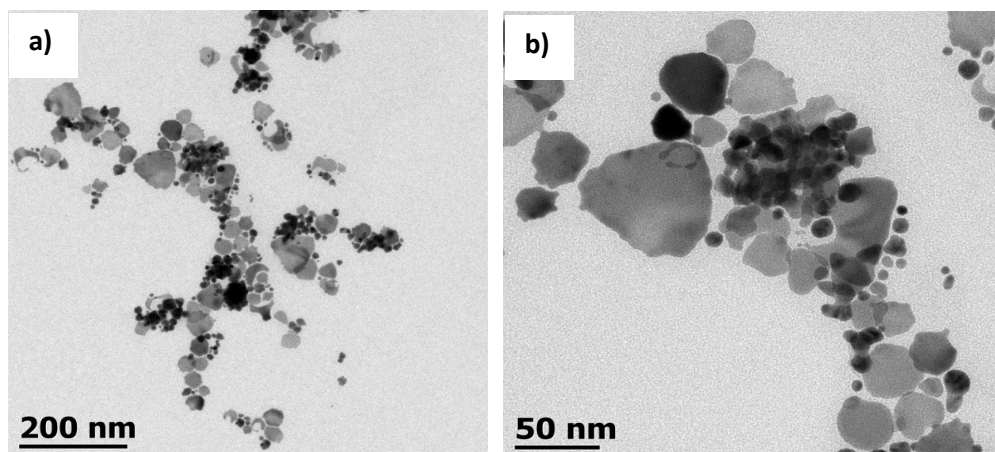

**Figure S3.** a) Low, and b) high-magnification TEM images of typical Ag@Au nanoplates prepared using the same condition without introducing PVP into the reaction mixture.

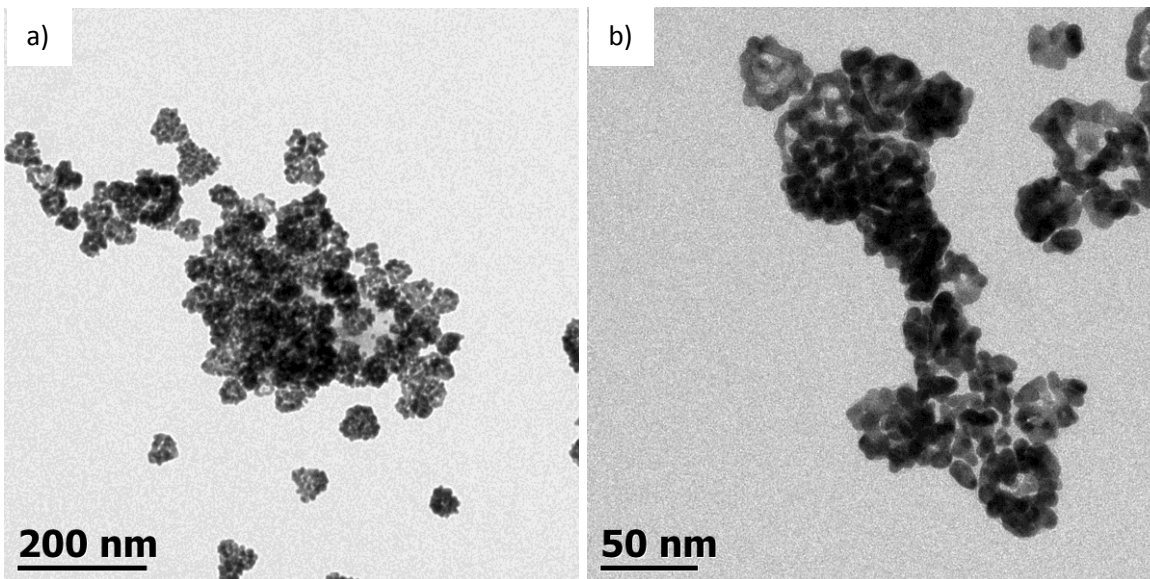

**Figure S4.** a) Low, and b) high-magnification TEM images of typical Ag@Au core-shell nanoplates using the standard procedure with high PVP content (100 mg) in the solution mixture; showing the porous features on the surface.

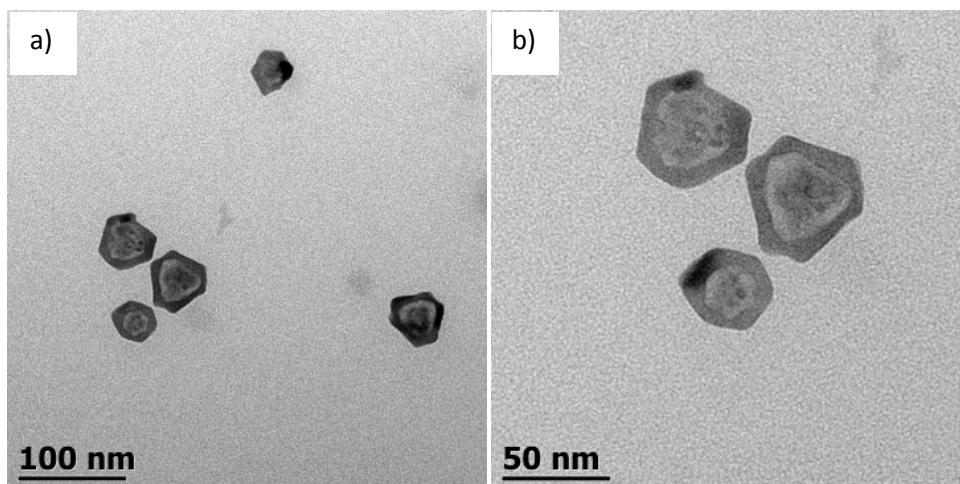

**Figure S5.** TEM images of typical Ag@Au core-shell nanoplates using the standard procedure only replacing PVP to CTAB.

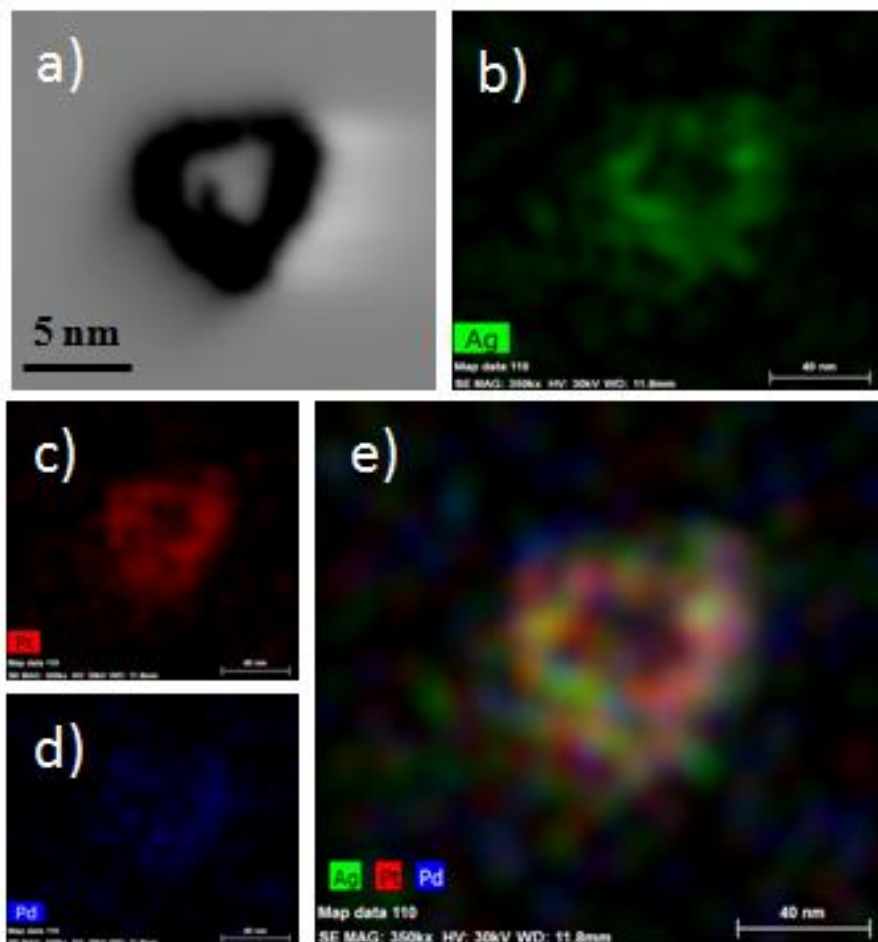

**Figure S6.** a) HAADF-STEM of triangular Ag@PtPd trimetallic hollow nanoparticles. b-e) EDX-elemental mapping of the individual Ag@PtPd showing Ag (Green), Pt (Red), Pd (Blue) and e) overlay of the signals of Ag@PtPd signals.
